# Supplementary material for: Finding the Optimal Surgical Incision Pattern—A Biomechanical Study
Source: J Clin Med. 2022 May 5;11(9):2600. doi: 10.3390/jcm11092600 (PMC9099478; doi:10.3390/jcm11092600)
Supplement: Supplementary file 1 [file jcm-11-02600-s001.zip › jcm-1656479-supplementary.pdf]

### Supplementary Data

|                                                                        | Straight                 | Lazy-S -<br>perpendicular | Zigzag -<br>perpendicular | Lazy-S -<br>tensile<br>direction | Zigzag -<br>tensile<br>direction |
|------------------------------------------------------------------------|--------------------------|---------------------------|---------------------------|----------------------------------|----------------------------------|
| <b>Resistance to<br/>Deformity<br/>(%)</b>                             | 38.7 (20.7) <sup>a</sup> | 59.2 (43.0) <sup>b</sup>  | 63.0 (42.7) <sup>b</sup>  | 36.7 (20.5) <sup>a</sup>         | 44.9 (25.6) <sup>ab</sup>        |
| <b>First suture failure<br/>load (first failure<br/>load)<br/>(% )</b> | 36.9 (15.4) <sup>a</sup> | 50.2 (28.3) <sup>a</sup>  | 58.3 (36.1) <sup>b</sup>  | 35.7 (8.9) <sup>ab</sup>         | 41.7 (14.4) <sup>ab</sup>        |
| <b>Second suture<br/>failure load<br/>(% )</b>                         | 37.7 (15.1) <sup>a</sup> | 53.8 (37.5) <sup>a</sup>  | 64.0 (38.7) <sup>b</sup>  | 35.4 (10.3) <sup>ab</sup>        | 43.4 (18.6) <sup>ab</sup>        |
| <b>Third suture<br/>failure load (final<br/>failure load) (% )</b>     | 36.1 (20.7) <sup>a</sup> | 58.0 (45.2) <sup>b</sup>  | 65.0 (39.4) <sup>b</sup>  | 32.7 (11.9) <sup>a</sup>         | 43.7 (24.5) <sup>ab</sup>        |

**Table S1. Mean relative values for experimental groups.** Data is expressed in % (SD) as compared to controls. Different superscripts indicate statistically significant differences among groups at p of at least < 0.05. For each experimental group, 17 incision-patterns were tested.
